# Supplementary material for: Antityrosinase activity of Euphorbia characias extracts
Source: PeerJ. 2015 Oct 13;3:e1305. doi: 10.7717/peerj.1305 (PMC4614905; doi:10.7717/peerj.1305)
Supplement: Supplemental Information 1 [file peerj-03-1305-s001.xlsx]

## Sheet: Figure1A
1/[DOPA]	1/V no extract	1/V 0.25 mg/ml	1/V 0.1 mg/ml	1/V 0.05 mg/ml	Linear fit no extract	Linear fit 0.25 mg/ml	Linear fit 0.05 mg/ml	Linear fit 0.1 mg/ml		Slope	[AEL] mg/ml	Linear fit	Ki			1/Vmax	[AEL] mg/ml	Linear fit	Ki'
0.8	1.566	3.06	2.2217	1.9231	1.38894	2.39825	1.55261	1.77459		0.3081	0	0.31375	0.0974984			1.3889	0	1.3694	0.334645
1.6	1.8251	3.981	2.733	2.266	0.3081	1.11743	0.48337	0.63329		0.4834	0.05	3.218				1.5526	0.05	4.0921
4	2.68	6.98	4.2882	3.5063						0.6333	0.1					1.7746	0.1
8	4	11.98	7.0821	5.528						1.1174	0.25					2.3983	0.25
16	6.24	19.96	11.8	9.234

## Sheet: Figure1B
1/[DOPA]	1/V no extract	Linear fit no extract	1/V 50 μg/ml	Linear fit 50 μg/ml	1/V 100 μg/ml	Linear fit 100 μg/ml	1/V 150 μg/ml	Linear fit 150 μg/ml		slope	[EEL] μg/ml	Linear fit	Ki
0.8	1.5124	1.3138	2.0375	1.36869	2.3452	1.37152	2.95	1.41721		0.31213	0	0.21539	23.6173
1.6	1.7464	0.31213	2.445	0.57486	3.0331	1.02964	5.0429	1.67994		0.57486	50	0.00912
4	2.6688		3.391		5.1975		7.7042			1.02964	100
8	3.8685		5.7045		9.7371		13.459			1.67994	150
16	6.2617		10.7411		17.8458		29
