# Supplementary material for: Antityrosinase activity of Euphorbia characias extracts
Source: PeerJ. 2015 Oct 13;3:e1305. doi: 10.7717/peerj.1305 (PMC4614905; doi:10.7717/peerj.1305)
Supplement: Supplemental Information 5 [file peerj-03-1305-s005.xlsx]

## Sheet: Figure 5
	Area	Relative intensity (%)
1	6984.57	34.9449	Control (without MSH)
2	19987.4	100	Control (with MSH)
3	20012	100.123	Kojic Acid 100 μg/mL
4	13802.4	69.0554	Kojic Acid 200 μg/mL
5	14905.1	74.5724	EAL 100 μg/mL
6	8541.25	42.7332	EAL 250 μg/mL
7	10483.6	52.4511	EEL 50 μg/mL
8	8356.74	41.81	EEL 100 μg/mL
